# Supplementary material for: Orthogonal magnetic orbitals in high spin Cu–VO units: structure, magnetism and EPR study of anisotropic heterometallic complexes
Source: Royal Society of Chemistry journal article supplement (doi:10.1039/d4dt01346h), 2024-01-01
Supplement: d4dt01346h1.pdf [file d4dt01346h1.pdf]

## Supplementary Information

### Orthogonal magnetic orbitals in high spin Cu-VO units: structure, magnetism and EPR study of anisotropic heterometallic complexes

Qing-Song Deng,<sup>a</sup> Yu-Shuang Zhang,<sup>a</sup> Ye-Xin Wang,<sup>b</sup> Yi Xie,<sup>a</sup> Peng-Xiang Fu,<sup>c</sup> Song Gao,<sup>a,d</sup> Zheng Liu<sup>\*d</sup> and Shang-Da Jiang<sup>\*a</sup>

- a. Spin-X Institute, School of Chemistry and Chemical Engineering, South China University of Technology, Guangzhou, 511442, China. E-mail: jiangsd@scut.edu.cn
- b. Quantum Science Center of Guangdong-Hong Kong-Macao Greater Bay Area, Shenzhen, 518045, China. E-mail: wangyexin@quantumsc.cn
- c. Beijing National Laboratory of Molecular Science, Beijing Key Laboratory of Magnetoelectric Materials and Devices, College of Chemistry and Molecular Engineering, Peking University, Beijing (China)
- d. Key Laboratory of Bioinorganic and Synthetic Chemistry of Ministry of Education, LIFM, School of Chemistry, IGCM, Sun Yat-Sen University, Guangzhou 510275, China. E-mail: liuzh363@mail.sysu.edu.cn

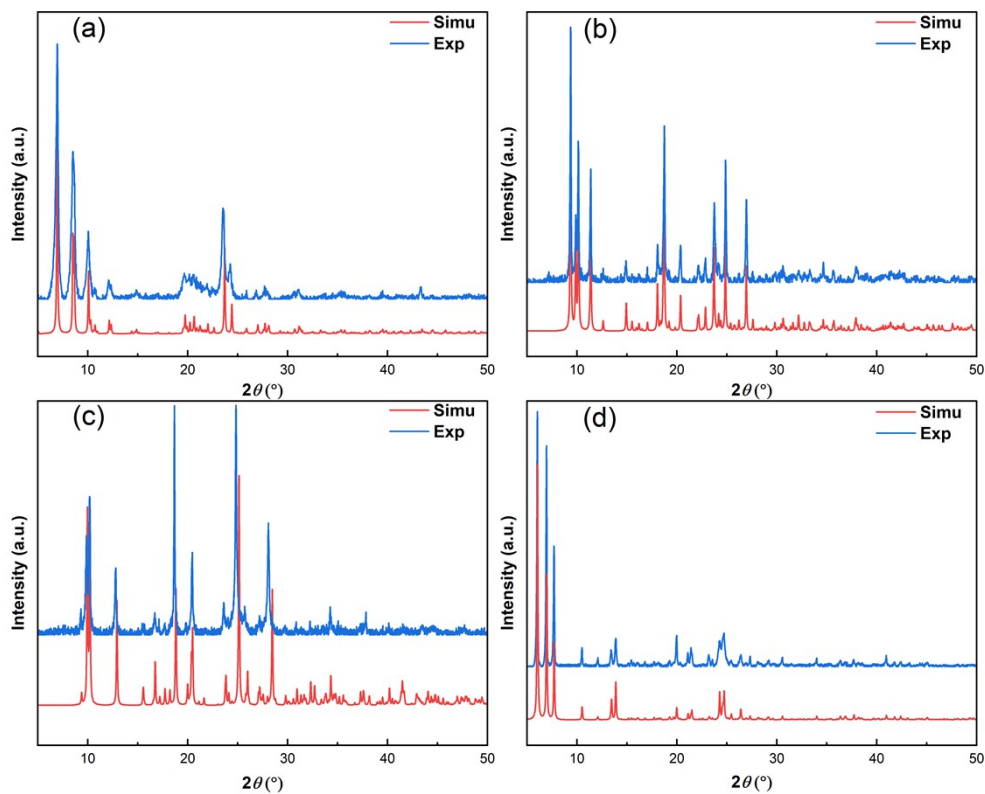

**Figure S1.** PXRD patterns of **1a** (a), **2a** (b), **2b** (c), **2c** (d). The simulated one based on their single crystal structures.

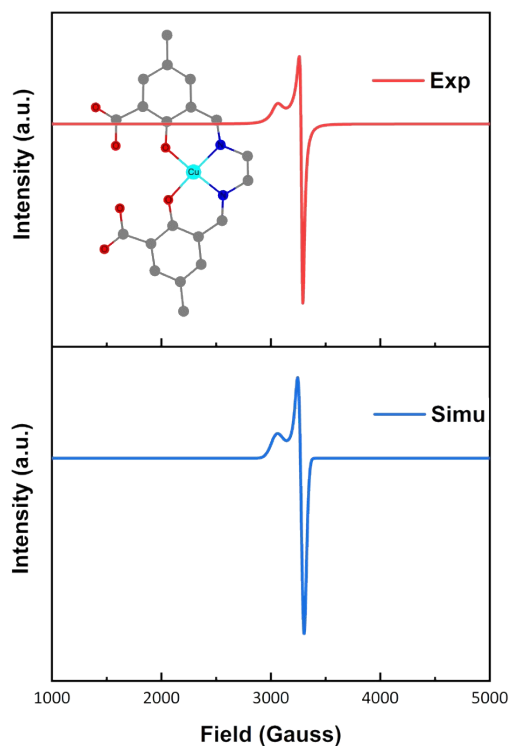

**Figure S2.** 9.388 GHz EPR spectrum of mononuclear Cu<sup>II</sup> complex at 10 K. The inset shows the corresponding molecular structure.

The Hamiltonian is:  $\hat{H} = \mu_B \vec{B}^T \vec{g}_{Cu} \hat{S}$ . The principal values of  $\vec{g}_{Cu}$  obtained from the simulation is [2.04 2.04 2.22].

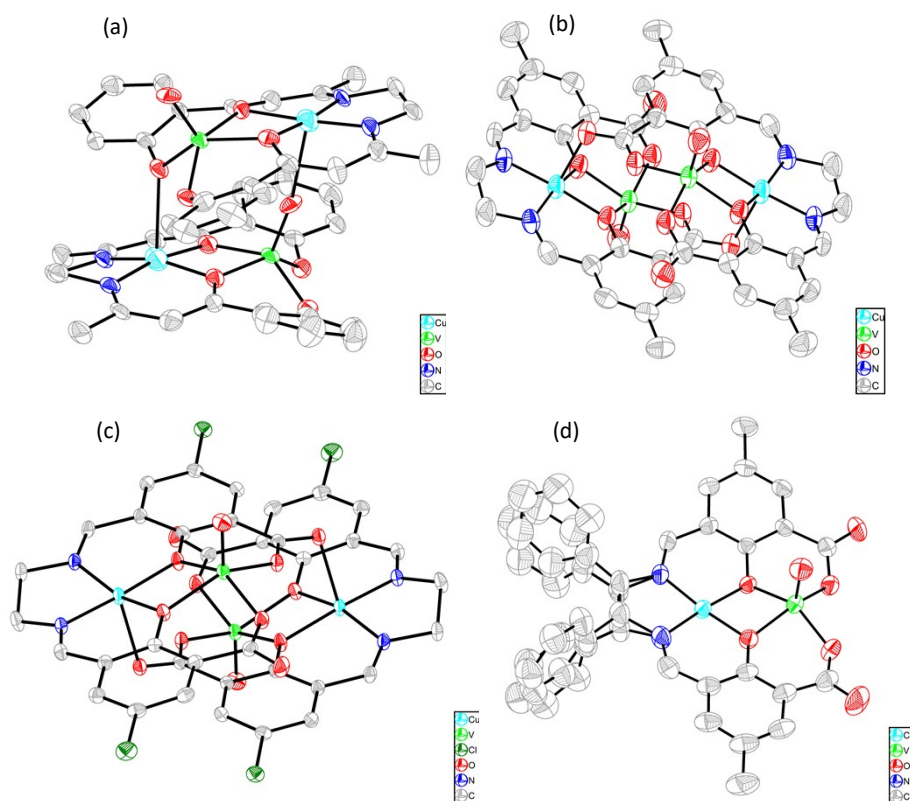

**Figure S3.** Structural representation of **1a** (a), **2a** (b), **2b** (c) and **2c** (d) with hydrogen atoms omitted (50% probability thermal ellipsoids).

**Table S1.** Crystallographic data of **1a**, **2a**, **2b** and **2c**

|                                            | <b>1a</b>                      | <b>2a</b>                      | <b>2b</b>                          | <b>2c</b>               |
|--------------------------------------------|--------------------------------|--------------------------------|------------------------------------|-------------------------|
| Formula                                    | $C_{44}H_{40}Cu_2N_4O_{10}V_2$ | $C_{40}H_{32}Cu_2N_4O_{14}V_2$ | $C_{36}H_{20}Cl_4Cu_2N_4O_{14}V_2$ | $C_{32}H_{24}CuN_2O_7V$ |
| FW (g mol <sup>-1</sup> )                  | 1013.76                        | 1021.65                        | 1103.32                            | 663.01                  |
| Crystal system                             | triclinic                      | monoclinic                     | triclinic                          | triclinic               |
| Space group                                | <i>P</i> -1                    | <i>C</i> 2/ <i>c</i>           | <i>P</i> -1                        | <i>P</i> -1             |
| <i>a</i> (Å)                               | 9.0873(2)                      | 20.1187(8)                     | 9.6581(2)                          | 7.3860(2)               |
| <i>b</i> (Å)                               | 13.3569(3)                     | 10.8875(4)                     | 10.7180(3)                         | 13.3981(4)              |
| <i>c</i> (Å)                               | 17.7604(3)                     | 18.4955(7)                     | 10.7586(3)                         | 15.4197(4)              |
| $\alpha$ (°)                               | 86.312(2)                      | 90                             | 114.387(3)                         | 71.938(2)               |
| $\beta$ (°)                                | 80.406(1)                      | 109.576(4)                     | 94.858(2)                          | 84.339(2)               |
| $\gamma$ (°)                               | 72.478(2)                      | 90                             | 111.117(2)                         | 83.891(2)               |
| <i>V</i> (Å <sup>3</sup> )                 | 2026.72(8)                     | 3817.1(3)                      | 909.78(5)                          | 1438.99(7)              |
| $\rho_{\text{calc}}$ (g·cm <sup>-3</sup> ) | 1.661                          | 1.778                          | 2.014                              | 1.530                   |
| $\mu$ (mm <sup>-1</sup> )                  | 1.55                           | 1.653                          | 2.026                              | 1.116                   |
| <i>F</i> (000)                             | 1032.0                         | 2064.0                         | 548.0                              | 676.0                   |
| Collected reflections                      | 38210                          | 14216                          | 24914                              | 21737                   |
| Independent reflections                    | 7386                           | 4840                           | 4859                               | 7306                    |
| <i>R</i> <sub>int</sub>                    | 0.122                          | 0.0262                         | 0.0314                             | 0.0261                  |

|                        |       |        |        |        |
|------------------------|-------|--------|--------|--------|
| $R_1 [I > 2\sigma(I)]$ | 0.068 | 0.0390 | 0.0262 | 0.0793 |
| $wR_2$ (all data)      | 0.174 | 0.1088 | 0.0712 | 0.2426 |
| GOF                    | 1.076 | 1.017  | 1.070  | 1.092  |

**Table S2.** Selected bond lengths [Å] and angles [°] for **1a**, **2a**, **2b** and **2c**

| <b>1a</b>                            |             |           |             |                        |             |
|--------------------------------------|-------------|-----------|-------------|------------------------|-------------|
| Cu1—O4                               | 1.937 (7)   | V1—O4     | 2.025 (7)   | Cu2—O2                 | 1.929 (8)   |
| Cu1—O5                               | 1.933 (8)   | V1—O5     | 2.025 (8)   | Cu2—N1                 | 1.906 (9)   |
| Cu1—O9                               | 2.401 (7)   | V1—O6     | 1.908 (8)   | Cu2—N2                 | 1.902 (10)  |
| Cu1—N3                               | 1.898 (9)   | V1—O8     | 1.599 (7)   | V2—O7                  | 1.918 (8)   |
| Cu1—N4                               | 1.892 (10)  | V2—O1     | 1.994 (8)   | V2—O9                  | 1.578 (8)   |
| Cu2—O1                               | 1.932 (8)   | V2—O2     | 2.037 (8)   | V2—O10                 | 1.899 (8)   |
| V1—O3                                | 1.930 (7)   |           |             |                        |             |
| O4—Cu1—O9                            | 81.8 (3)    | O6—V1—O4  | 145.4 (3)   | O10—V2—O1              | 142.4 (3)   |
| O5—Cu1—O4                            | 80.6 (3)    | O6—V1—O5  | 87.4 (3)    | O10—V2—O2              | 84.8 (3)    |
| O5—Cu1—O9                            | 84.8 (3)    | O8—V1—O3  | 108.1 (4)   | O10—V2—O7              | 90.7 (3)    |
| N3—Cu1—O4                            | 95.6 (4)    | O8—V1—O4  | 107.5 (4)   | Cu2—O1—V2              | 102.9 (4)   |
| N3—Cu1—O5                            | 174.5 (4)   | O8—V1—O5  | 107.1 (4)   | Cu2—O2—V2              | 101.4 (4)   |
| N3—Cu1—O9                            | 98.6 (3)    | O8—V1—O6  | 106.4 (4)   | Cu1—O4—V1              | 100.7 (3)   |
| N4—Cu1—O4                            | 174.3 (4)   | O1—V2—O2  | 75.4 (3)    | V2—O9—Cu1              | 169.9 (5)   |
| N4—Cu1—O5                            | 95.9 (4)    | O7—V2—O1  | 85.2 (3)    | N2—Cu2—O1              | 161.9 (4)   |
| N4—Cu1—O9                            | 102.4 (3)   | O7—V2—O2  | 140.6 (3)   | N2—Cu2—O2              | 95.0 (4)    |
| N4—Cu1—N3                            | 87.6 (4)    | O9—V2—O1  | 109.2 (4)   | N2—Cu2—N1              | 87.6 (4)    |
| O2—Cu2—O1                            | 79.4 (3)    | O9—V2—O2  | 110.1 (4)   | O3—V1—O4               | 87.2 (3)    |
| N1—Cu2—O1                            | 95.2 (4)    | O9—V2—O7  | 108.6 (4)   | O3—V1—O5               | 144.2 (3)   |
| N1—Cu2—O2                            | 169.7 (4)   | O9—V2—O10 | 107.6 (4)   | O5—V1—O4               | 76.3 (3)    |
| O6—V1—O3                             | 88.8 (3)    |           |             |                        |             |
| <b>2a</b>                            |             |           |             |                        |             |
| Cu1—V1                               | 3.0231 (5)  | V1—O3     | 1.9484 (17) | V1—O4                  | 1.928 (2)   |
| Cu1—O1                               | 1.9059 (17) | V1—O1     | 1.9802 (18) | V1—O7                  | 1.579 (2)   |
| Cu1—O2                               | 1.9241 (18) | V1—O2     | 1.9753 (18) | Cu1—N2                 | 1.897 (2)   |
| Cu1—O5 <sup>i</sup>                  | 2.349 (2)   | Cu1—N1    | 1.900 (2)   |                        |             |
| O1—Cu1—V1                            | 39.82 (5)   | O3—V1—O1  | 84.17 (7)   | N2—Cu1—V1              | 133.43 (7)  |
| O1—Cu1—O2                            | 79.46 (7)   | O3—V1—O2  | 143.78 (8)  | N2—Cu1—O1              | 169.82 (9)  |
| O1—Cu1—O5 <sup>i</sup>               | 93.30 (8)   | O1—V1—Cu1 | 38.05 (5)   | N2—Cu1—O2              | 94.90 (9)   |
| O2—Cu1—V1                            | 39.79 (5)   | O2—V1—Cu1 | 38.56 (5)   | N2—Cu1—O5 <sup>i</sup> | 95.48 (9)   |
| O2—Cu1—O5 <sup>i</sup>               | 93.11 (8)   | O2—V1—O1  | 76.47 (7)   | N2—Cu1—N1              | 87.73 (10)  |
| O5 <sup>i</sup> —Cu1—V1              | 96.85 (5)   | O4—V1—Cu1 | 120.52 (6)  | O7—V1—O3               | 107.06 (10) |
| N1—Cu1—V1                            | 131.62 (8)  | O4—V1—O3  | 92.42 (8)   | O7—V1—O1               | 108.27 (11) |
| N1—Cu1—O1                            | 95.16 (9)   | O4—V1—O1  | 144.89 (9)  | O7—V1—O2               | 107.97 (10) |
| N1—Cu1—O2                            | 162.43 (10) | O4—V1—O2  | 86.55 (8)   | O7—V1—O4               | 106.13 (11) |
| N1—Cu1—O5 <sup>i</sup>               | 103.95 (9)  | O7—V1—Cu1 | 110.77 (8)  | Cu1—O1—V1              | 102.12 (8)  |
| Cu1—O2—V1                            | 101.65 (8)  |           |             |                        |             |
| Symmetry code: (i) -x+1, -y+1, -z+1. |             |           |             |                        |             |
| <b>2b</b>                            |             |           |             |                        |             |
| Cu1—V1                               | 3.0259 (4)  | V1—O3     | 1.9566 (13) | V1—O7                  | 1.5890 (14) |
| Cu1—O1                               | 1.9127 (12) | V1—O1     | 1.9858 (12) | Cu1—N1                 | 1.9096 (15) |
| Cu1—O2                               | 1.9258 (12) | V1—O2     | 1.9855 (12) | Cu1—N2                 | 1.8952 (15) |
| Cu1—O5 <sup>i</sup>                  | 2.3311 (13) | V1—O4     | 1.9269 (13) |                        |             |
| O1—Cu1—V1                            | 39.97 (4)   | O3—V1—O1  | 84.53 (5)   | O7—V1—O3               | 107.29 (7)  |
| O1—Cu1—O2                            | 79.81 (5)   | O3—V1—O2  | 143.96 (6)  | O7—V1—O1               | 108.19 (7)  |
| O1—Cu1—O5 <sup>i</sup>               | 92.44 (5)   | O1—V1—Cu1 | 38.22 (4)   | O7—V1—O2               | 107.70 (7)  |
| O2—Cu1—V1                            | 40.04 (4)   | O2—V1—Cu1 | 38.61 (4)   | O7—V1—O4               | 105.78 (7)  |
| O2—Cu1—O5 <sup>i</sup>               | 94.21 (5)   | O2—V1—O1  | 76.64 (5)   | Cu1—O1—V1              | 101.81 (6)  |
| O5—Cu1—V1                            | 97.49 (3)   | O4—V1—Cu1 | 120.88 (4)  | Cu1—O2—V1              | 101.35 (6)  |
| N1—Cu1—V1                            | 131.81 (5)  | O4—V1—O3  | 92.20 (6)   | N2—Cu1—V1              | 134.33 (5)  |
| N1—Cu1—O1                            | 95.08 (6)   | O4—V1—O1  | 145.28 (6)  | N2—Cu1—O1              | 171.92 (6)  |
| N1—Cu1—O2                            | 163.61 (6)  | O4—V1—O2  | 86.52 (5)   | N2—Cu1—O2              | 95.30 (6)   |

|                                      |             |           |             |                         |             |
|--------------------------------------|-------------|-----------|-------------|-------------------------|-------------|
| N1—Cu1—O5 <sup>i</sup>               | 101.60 (6)  | O7—V1—Cu1 | 110.14 (5)  | N2—Cu1—O5 <sup>i</sup>  | 94.33 (5)   |
| N2—Cu1—N1                            | 87.85 (6)   | O3—V1—Cu1 | 118.56 (4)  |                         |             |
| Symmetry code: (i) -x+1, -y+1, -z+1. |             |           |             |                         |             |
| <b>2c</b>                            |             |           |             |                         |             |
| Cu1—V1                               | 2.9612 (9)  | V1—O2     | 1.923 (4)   | V1—O3                   | 1.586 (4)   |
| Cu1—O5                               | 1.914 (3)   | V1—O4     | 1.947 (3)   | Cu1—N2                  | 1.897 (4)   |
| Cu1—O6                               | 1.922 (3)   | V1—O5     | 1.961 (3)   | Cu1—O3 <sup>i</sup>     | 2.438 (4)   |
| Cu1—N1                               | 1.895 (4)   | V1—O6     | 1.998 (3)   |                         |             |
| O5—Cu1—V1                            | 40.76 (10)  | O2—V1—O4  | 93.82 (16)  | N2—Cu1—V1               | 134.61 (16) |
| O5—Cu1—O6                            | 80.65 (14)  | O2—V1—O5  | 86.68 (16)  | N2—Cu1—O5               | 95.32 (19)  |
| O5—Cu1—O3 <sup>i</sup>               | 93.38 (15)  | O2—V1—O6  | 146.25 (16) | N2—Cu1—O6               | 175.54 (18) |
| O6—Cu1—V1                            | 41.92 (10)  | O4—V1—Cu1 | 123.97 (11) | N2—Cu1—O3 <sup>i</sup>  | 92.7 (2)    |
| O6—Cu1—O3 <sup>i</sup>               | 89.41 (15)  | O4—V1—O5  | 148.39 (16) | O3 <sup>i</sup> —Cu1—V1 | 81.87 (10)  |
| N1—Cu1—V1                            | 134.76 (13) | O4—V1—O6  | 84.89 (14)  | O2—V1—Cu1               | 124.72 (13) |
| N1—Cu1—O5                            | 174.17 (18) | O5—V1—Cu1 | 39.58 (10)  | O3—V1—O2                | 107.4 (2)   |
| N1—Cu1—O6                            | 96.18 (16)  | O5—V1—O6  | 77.65 (13)  | O3—V1—O4                | 103.4 (2)   |
| N1—Cu1—N2                            | 88.0 (2)    | O6—V1—Cu1 | 40.00 (9)   | O3—V1—O5                | 106.6 (2)   |
| N1—Cu1—O3 <sup>i</sup>               | 81.65 (18)  | O3—V1—Cu1 | 101.44 (16) | O3—V1—O6                | 105.71 (18) |
| Cu1—O5—V1                            | 99.66 (15)  | Cu1—O6—V1 | 98.08 (14)  |                         |             |
| Symmetry code: (i) -x+1, -y+2, -z.   |             |           |             |                         |             |

| Compound  | $J / \text{cm}^{-1}$ | $\varphi / ^\circ$ | $\theta / ^\circ$ | $R / \text{Å}$ | $R' / \text{Å}$ | Ref       |
|-----------|----------------------|--------------------|-------------------|----------------|-----------------|-----------|
| <b>2c</b> | -132.66              | 1.6                | 98.08, 99.66      | 2.096          | 3.86            | This work |
| <b>D</b>  | -91.20               | 6.41               | 101.8, 101.86     | 3.089          | 3.98            | 1         |
| <b>2a</b> | -122.40              | 8.9                | 102.12, 101.66    | 3.023          | 3.88            | This work |
| <b>2b</b> | -117.85              | 9.2                | 101.81, 101.35    | 3.026          | 3.9             | This work |
| <b>C</b>  | -118                 | 9.8                | 99.21, 98.47      | 2.989          | 3.92            | 2         |
| <b>1a</b> | -94                  | 27.5               | 102.16, 100.68    | 3.054          | 3.94            | This work |
| <b>B</b>  | -85                  | 31.97              | 97.51, 98.02      | 3.067          | 4.06            | 3         |
| <b>A</b>  | -85                  | 31.43              | 106.34, 94.37     | 3.131          | 3.92            | 4         |

**Table S3.** Coupling constant and structural parameters.

## References

- 1 T. Glaser, H. Theil, I. Liratzis, T. Weyhermüller and E. Bill, *Inorganic Chemistry*, 2006, **45**, 4889-4891.
- 2 O. Kahn, J. Galy, Y. Journaux, J. Jaud and I. Morgenstern-Badarau, *Journal of the American Chemical Society*, 1982, **104**, 2165-2176.
- 3 S. Mohanta, K. K. Nanda, L. K. Thompson, U. Flörke and K. Nag, *Inorganic Chemistry*, 1998, **37**, 1465-1472.
- 4 A. Bencini, C. Benelli, A. Dei and D. Gatteschi, *Inorganic Chemistry*, 1985, **24**, 695-699.

**Relationship between  $J_{23}$  in four  $S = 1/2$  spins coupled model and  $J_{iso}$  in two  $S = 1$  spins coupled model**

The energy gaps between different spin multiplicities is relevant for isotropic exchange interactions, and based on symmetry consideration, these energy gaps in “multi-spin” system can be obtained by diagonalizing the Hamiltonian as follow

$$\hat{H} = J_1 \hat{S}_1^T \hat{S}_2 + J_2 \hat{S}_2^T \hat{S}_3 + J_1 \hat{S}_3^T \hat{S}_4 + J_2 \hat{S}_4^T \hat{S}_1 \#(1)$$

**Table S4.** Eigenvalues of the  $16 \times 16$  Hamiltonian matrix.

| eigenvalue                                               | spin multiplicity |
|----------------------------------------------------------|-------------------|
| $-\frac{J_1 + J_2}{2}$                                   | 3                 |
| $\frac{J_1 - J_2}{2}$                                    | 3                 |
| $-\frac{J_1 - J_2}{2}$                                   | 3                 |
| $\frac{J_1 + J_2}{2}$                                    | 5                 |
| $-\frac{J_1 + J_2 + 2\sqrt{J_1^2 - J_1 J_2 + J_2^2}}{2}$ | 1                 |
| $-\frac{J_1 + J_2 - 2\sqrt{J_1^2 - J_1 J_2 + J_2^2}}{2}$ | 1                 |

The nine lowest energy levels of the system contain a quintet, a triplet, and a singlet, with energy gaps  $E_1$  for the quintet and triplet and  $E_2$  for the triplet and singlet.

$$E_1 = J_2 \#(2)$$

$$E_2 = |J_1 + \sqrt{J_1^2 - J_1 J_2 + J_2^2}| \#(3)$$

When  $J_2/J_1$  tends to 0,

$$\lim_{\frac{J_2}{J_1} \rightarrow 0} |J_1 + \sqrt{J_1^2 - J_1 J_2 + J_2^2}| = \left| \frac{J_2}{2} \right| \#(4)$$

Based on the interactions obtained from the magnetic data, the electronic structure of **2b** and **2c** at low energy can also be approximated by the “giant-spin” Hamiltonian. The coupling between two  $S = 1$  spins is denoted by  $J_{iso}$ ,

$$\hat{H} = J_{iso} \hat{S}_a^T \hat{S}_b \#(5)$$

The eigenvalues of this  $9 \times 9$  Hamiltonian matrix as shown in Table S5.

**Table S5.** Eigenvalues of the  $9 \times 9$  Hamiltonian matrix.

| eigenvalue  | spin multiplicity |
|-------------|-------------------|
| $-2J_{iso}$ | 1                 |
| $-J_{iso}$  | 3                 |
| $J_{iso}$   | 5                 |

The energy gap between the quintet and triplet is  $E_1'$ , and the energy gap between the triplet and singlet is  $E_2'$ .

$$E_1' = 2J_{iso} \#(6)$$

$$E_2' = J_{iso} \#(7)$$

Comparing Equation (2), Equation (4) and Equation (6), Equation (7), a following relationship exists when  $J_2/J_1$  tends to 0,

$$J_{iso} = \frac{J_2}{2} \#(8)$$

**Table S6.** Hamiltonian parameters used for calculation.

| EPR parameters                    | 2b     | 2c     |
|-----------------------------------|--------|--------|
| $g_{i\parallel}$                  | 2.08   | 2.08   |
| $g_{i\perp}$                      | 2.00   | 2.00   |
| $D_{ixx} / \text{cm}^{-1}$        | 0.063  | 0.067  |
| $D_{iyy} / \text{cm}^{-1}$        | -0.141 | -0.174 |
| $D_{izz} / \text{cm}^{-1}$        | 0.078  | 0.107  |
| $J_{\text{iso}} / \text{cm}^{-1}$ | -0.373 | 5.18   |
| $D_{abxx} / \text{cm}^{-1}$       | -0.165 | -0.267 |
| $D_{abyy} / \text{cm}^{-1}$       | -0.140 | -0.133 |
| $D_{abzz} / \text{cm}^{-1}$       | 0.305  | 0.400  |

**Table S7.** Matrix elements calculated with the following spin Hamiltonian and basis sets at zero field of effective model containing two  $S = 1$  spins.

$$\hat{H} = \sum_{i=a}^b \mu_B \vec{B}^T g_i \hat{S}_i + \sum_{i=a}^b \hat{S}_i^T \vec{D}_i \hat{S}_i + J \hat{S}_a^T \hat{S}_b + \hat{S}_a^T \vec{D}_{ab} \hat{S}_b \#(9)$$

|                  | $ 1,1\rangle$                          | $ 1,0\rangle$           | $ 1,-1\rangle$                         | $ 0,1\rangle$           | $ 0,0\rangle$           | $ 0,-1\rangle$          | $ -1,1\rangle$                         | $ -1,0\rangle$          | $ -1,-1\rangle$                        |
|------------------|----------------------------------------|-------------------------|----------------------------------------|-------------------------|-------------------------|-------------------------|----------------------------------------|-------------------------|----------------------------------------|
| $\langle 1,1 $   | $\frac{2D}{3} + \frac{2D_{ab}}{3} + J$ | 0                       | $E$                                    | 0                       | $E_{ab}$                | 0                       | $E$                                    | 0                       | 0                                      |
| $\langle 1,0 $   | 0                                      | $\frac{-D}{3}$          | 0                                      | $\frac{-D_{ab}}{3} + J$ | 0                       | $E_{ab}$                | 0                                      | $E$                     | 0                                      |
| $\langle 1,-1 $  | $E$                                    | 0                       | $\frac{2D}{3} - \frac{2D_{ab}}{3} - J$ | 0                       | $\frac{-D_{ab}}{3} + J$ | 0                       | 0                                      | 0                       | $E$                                    |
| $\langle 0,1 $   | 0                                      | $\frac{-D_{ab}}{3} + J$ | 0                                      | $\frac{-D}{3}$          | 0                       | $E$                     | 0                                      | $E_{ab}$                | 0                                      |
| $\langle 0,0 $   | $E_{ab}$                               | 0                       | $\frac{-D_{ab}}{3} + J$                | 0                       | $\frac{-4D}{3}$         | 0                       | $\frac{-D_{ab}}{3} + J$                | 0                       | $E_{ab}$                               |
| $\langle 0,-1 $  | 0                                      | $E_{ab}$                | 0                                      | $E$                     | 0                       | $\frac{-D}{3}$          | 0                                      | $\frac{-D_{ab}}{3} + J$ | 0                                      |
| $\langle -1,1 $  | $E$                                    | 0                       | 0                                      | 0                       | $\frac{-D_{ab}}{3} + J$ | 0                       | $\frac{2D}{3} - \frac{2D_{ab}}{3} - J$ | 0                       | $E$                                    |
| $\langle -1,0 $  | 0                                      | $E$                     | 0                                      | $E_{ab}$                | 0                       | $\frac{-D_{ab}}{3} + J$ | 0                                      | $\frac{-D}{3}$          | 0                                      |
| $\langle -1,-1 $ | 0                                      | 0                       | $E$                                    | 0                       | $E_{ab}$                | 0                       | $E$                                    | 0                       | $\frac{2D}{3} + \frac{2D_{ab}}{3} + J$ |



$D = \frac{3}{2}D_{zz}$ ,  $E = \frac{1}{2}(D_{xx} - D_{yy})$ .  $D_{xx}$ ,  $D_{yy}$  and  $D_{zz}$  are principal values of  $\bar{D}_i$ .

$D_{ab} = \frac{3}{2}D_{abzz}$ ,  $E_{ab} = \frac{1}{2}(D_{abxx} - D_{abyy})$ .  $D_{abxx}$ ,  $D_{abyy}$  and  $D_{abzz}$  are principal values of  $\bar{D}_{ab}$ .

**Table S8.** Energy level results obtained and corresponding state compositions of **2b**.

| Energy / GHz | Expression                    | State composition |               |                |               |               |                |                |                |                 |
|--------------|-------------------------------|-------------------|---------------|----------------|---------------|---------------|----------------|----------------|----------------|-----------------|
|              |                               | $ 1,1\rangle$     | $ 1,0\rangle$ | $ 1,-1\rangle$ | $ 0,1\rangle$ | $ 0,0\rangle$ | $ 0,-1\rangle$ | $ -1,1\rangle$ | $ -1,0\rangle$ | $ -1,-1\rangle$ |
| -23.402      | (Complicated)                 | -0.105            | 0             | 0.451          | 0             | 0.755         | 0              | 0.451          | 0              | -0.105          |
| -19.606      | $(2D+2D_{ab}+3J)/3$           | 0                 | -0.500        | 0              | -0.500        | 0             | 0.500          | 0              | 0.500          | 0               |
| -14.240      | $(-D-D_{ab}+3E+3E_{ab}+3J)/3$ | 0                 | -0.500        | 0              | -0.500        | 0             | -0.500         | 0              | -0.500         | 0               |
| -0.294       | $(-D+D_{ab}-3E+3E_{ab}-3J)/3$ | 0.683             | 0             | -0.051         | 0             | 0.250         | 0              | -0.051         | 0              | 0.683           |
| 0.300        | (Complicated)                 | -0.707            | 0             | 0              | 0             | 0             | 0              | 0              | 0              | 0.707           |
| 4.337        | $(-D-D_{ab}-3E-3E_{ab}+3J)/3$ | 0                 | 0             | 0.707          | 0             | 0             | 0              | -0.707         | 0              | 0               |
| 11.152       | $(2D-2D_{ab}-3J)/3$           | 0                 | 0.500         | 0              | -0.500        | 0             | 0.500          | 0              | -0.500         | 0               |
| 18.018       | $(-D+D_{ab}+3E-3E_{ab}-3J)/3$ | 0                 | 0.500         | 0              | -0.500        | 0             | -0.500         | 0              | 0.500          | 0               |
| 23.696       | (Complicated)                 | 0.151             | 0             | 0.542          | 0             | -0.606        | 0              | 0.542          | 0              | 0.151           |

**Table S9.** Energy level results obtained and corresponding state compositions of **2c**.

| Energy / GHz | Expression                    | State composition |               |                |               |               |                |                |                |                 |
|--------------|-------------------------------|-------------------|---------------|----------------|---------------|---------------|----------------|----------------|----------------|-----------------|
|              |                               | $ 1,1\rangle$     | $ 1,0\rangle$ | $ 1,-1\rangle$ | $ 0,1\rangle$ | $ 0,0\rangle$ | $ 0,-1\rangle$ | $ -1,1\rangle$ | $ -1,0\rangle$ | $ -1,-1\rangle$ |
| -310.670     | (Complicated)                 | 0.011             | 0             | -0.581         | 0             | 0.570         | 0              | -0.581         | 0              | 0.011           |
| -163.777     | $(-D+D_{ab}-3E+3E_{ab}-3J)/3$ | 0                 | 0             | -0.707         | 0             | 0             | 0              | 0.707          | 0              | 0               |
| -154.303     | $(2D-2D_{ab}-3J)/3$           | 0                 | -0.500        | 0              | 0.500         | 0             | -0.500         | 0              | 0.500          | 0               |
| -147.798     | $(-D+D_{ab}+3E-3E_{ab}-3J)/3$ | 0                 | -0.500        | 0              | 0.500         | 0             | 0.500          | 0              | -0.500         | 0               |
| 139.429      | (Complicated)                 | 0.041             | 0             | -0.402         | 0             | -0.821        | 0              | -0.402         | 0              | 0.041           |
| 144.470      | $(2D+2D_{ab}+3J)/3$           | 0                 | 0.500         | 0              | 0.500         | 0             | -0.500         | 0              | -0.500         | 0               |
| 150.616      | $(-D-D_{ab}+3E+3E_{ab}+3J)/3$ | 0                 | 0.500         | 0              | 0.500         | 0             | 0.500          | 0              | 0.500          | 0               |
| 170.792      | $(-D-D_{ab}-3E-3E_{ab}+3J)/3$ | -0.707            | 0             | 0              | 0             | 0             | 0              | 0              | 0              | 0.707           |
| 171.241      | (Complicated)                 | -0.706            | 0             | -0.033         | 0             | -0.039        | 0              | -0.033         | 0              | -0.706          |
